# Supplementary material for: Combing DNAzyme with single-walled carbon nanotubes for detection of Pb(ii) in water
Source: Royal Society of Chemistry journal article supplement (doi:10.1039/c0an00709a), 2010-12-13
Supplement: c0an00709a.pdf [file c0an00709a.pdf]

## Combing DNAzyme with Single-walled Carbon Nanotubes for Detection of Pb(II) in Water

Jingjing Yao<sup>a</sup>, Jishan Li<sup>a,b</sup>, Jeremy Owens<sup>c</sup>, and Wenwan Zhong<sup>a,\*</sup>

<sup>a</sup> Department of Chemistry, University of California, Riverside, Riverside, CA 92507, USA, Tel: +1-951-827-4925; Fax: +1-951-827-4713;

Email: [wenwan.zhong@ucr.edu](mailto:wenwan.zhong@ucr.edu)

<sup>b</sup> College of Chemistry and Chemical Engineering, State Key Laboratory for Chemo/Biosensing and Chemometrics, Hunan University, Changsha, 410082, P.R. China

<sup>c</sup> Department of Earth Sciences, University of California, Riverside, Riverside, CA 92507

**Figure S1** Fluorescence spectra of Cy3-ssDNA and Cy3-dsDNA without any SWCNT or with a) SWCNT, b) SWCNT-PEG, c) SWCNT-COOH, at 4.2 µg/mL.

(a)

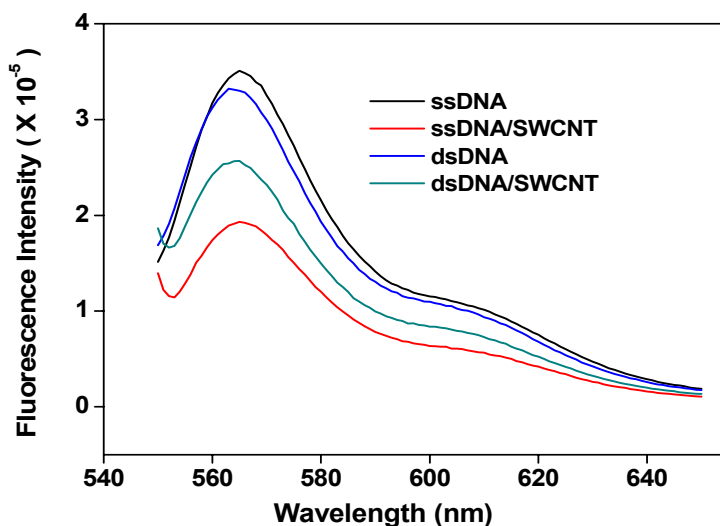

(b)

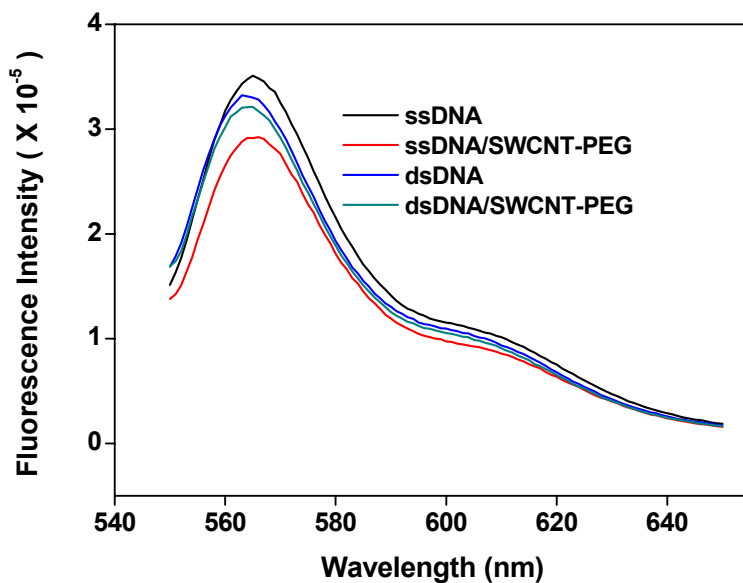

(c)

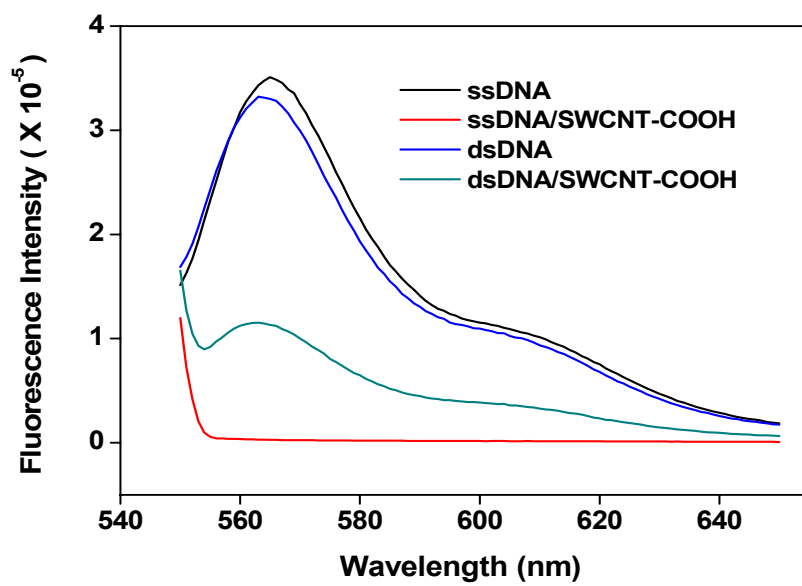

**Table S1. Metal contents in tap water samples measured by ICP-MS or ICP-AES.**

| <b>Metal concentration (nM)<br/>(n=2)</b> | <b>Riverside Household water<br/>(Measured by ICP-MS)</b> | <b>UCR Lab tap water<br/>(Measured by ICP-AES)</b> |
|-------------------------------------------|-----------------------------------------------------------|----------------------------------------------------|
| <b>Mg (<math>\mu\text{M}</math>)</b>      | <b>10.5 <math>\pm</math> 1.2</b>                          | <b>729 <math>\pm</math> 9.1</b>                    |
| <b>Mn</b>                                 | <b>Not detected</b>                                       | <b>170 <math>\pm</math> 0.0</b>                    |
| <b>Co</b>                                 | <b>Not detected</b>                                       | <b>Not detected</b>                                |
| <b>Ni</b>                                 | <b>Not detected</b>                                       | <b>38.1 <math>\pm</math> 0.0</b>                   |
| <b>Zn (<math>\mu\text{M}</math>)</b>      | <b>4.1 <math>\pm</math> 0.0</b>                           | <b>14.5 <math>\pm</math> 0.2</b>                   |
| <b>Cd</b>                                 | <b>Not detected</b>                                       | <b>Not detected</b>                                |
| <b>Pb</b>                                 | <b>14.3 <math>\pm</math> 0.0</b>                          | <b>193 <math>\pm</math> 0.1</b>                    |
